# Supplementary material
Source: PubMed Central journal article supplement (PMC8131174)
Supplement: 40271_2021_521_MOESM1_ESM.pdf [file 40271_2021_521_MOESM1_ESM.pdf]

**Assessing Patient Preferences in Rare Diseases: Direct Preference Elicitation in the  
Rare Chronic Kidney Disease, Immunoglobulin A Nephropathy**

**Assessing Patient Preferences in Rare Diseases: Direct Preference Elicitation in  
Immunoglobulin A Nephropathy**

Authors: Kevin Marsh<sup>1\*</sup>; Kerrie-Anne Ho<sup>2</sup>; Rachel Lo<sup>1</sup>, Nancy Zaour<sup>3</sup>;

Aneesh Thomas George<sup>4</sup>; Nigel S Cook<sup>3</sup>

<sup>1</sup>Evidera, London, UK; <sup>2</sup>UCB Pharma, Slough, UK; <sup>3</sup>Novartis Pharma AG, Basel, Switzerland,

<sup>4</sup>Novartis Healthcare Pvt. Ltd, Hyderabad, India

\*Corresponding Author:

Kevin Marsh

Evidera, London, UK

Ph: +44 (0) 208 576 5025

Email: Kevin.Marsh@evidera.com

## SUPPLEMENTARY MATERIAL – PREFERENCE ELICITATION AND BENEFIT RISK ASSESSMENT

### Preference elicitation

The preference elicitation involved two steps. Step 1 estimated the weight that each participant placed on the ‘swings’ in attributes, which are then normalized to sum to 1. Step 2 estimated the partial value function that described the relative value of changes withing each attribute.

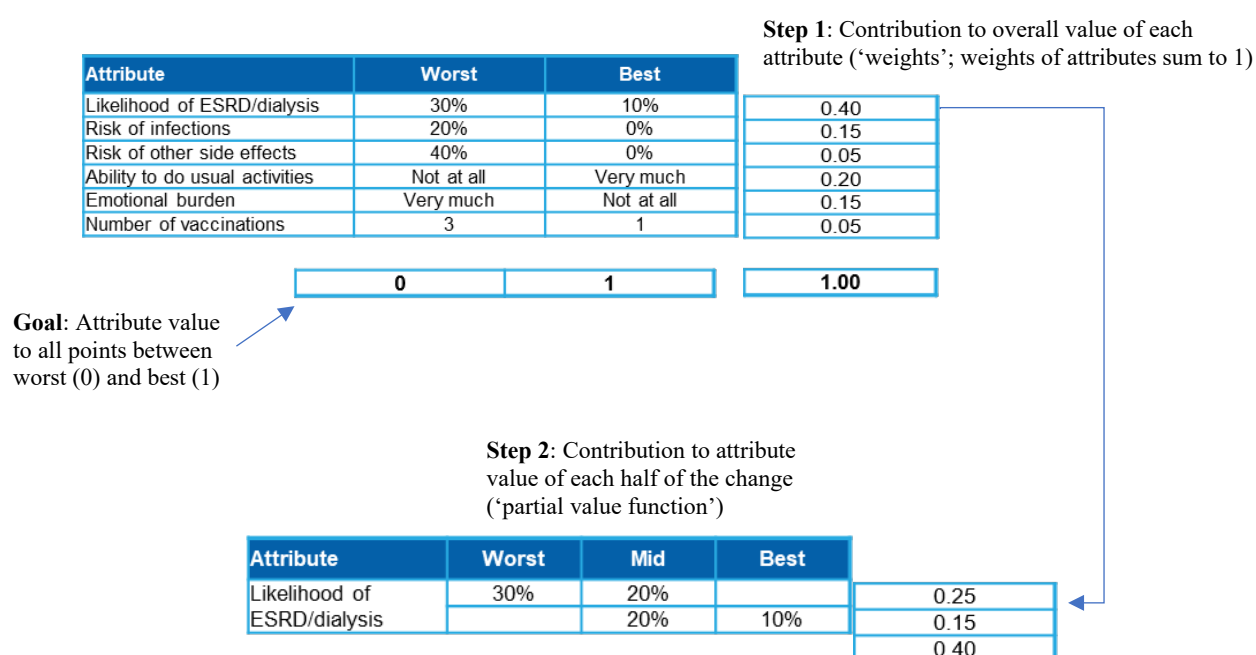

### Step 1: Swing weighting

In the first part of the exercise, participants ranked the improvements shown for each attribute (‘swing’) in the order of importance. Then 100 points was allocated to the first ranked attribute and participants were asked to rate the relative importance of the improvement in other attributes on a scale of 0-100 over a series of pair-wise tasks.

**Step 1a:** Rank ‘swings’ in order of importance

**Step 1b:** Pairwise comparison in order of ranks

**Step 1c:** Discuss / validate trade-offs

**Step 1d:** Normalise ‘weights’ to sum to 1

| Attribute                   | Worst | Best | Weight |
|-----------------------------|-------|------|--------|
| Likelihood of ESRD/dialysis | 30%   | 10%  | 100    |
| Risk of infections          | 20%   | 0%   | 37.5   |

Pairwise comparisons were undertaken between attributes ranked first and second, second and third, third and fourth, etc. In order to validate participants' responses, an additional rating task was included where participants were asked to compare between the first and third-ranked attribute as part of a consistency check.

**Pairs of attribute comparisons**

| <u>Top row</u>          | <u>Bottom row</u>       |
|-------------------------|-------------------------|
| First ranked attribute  | Second ranked attribute |
| Second ranked attribute | Third ranked attribute  |
| Third ranked attribute  | Fourth ranked attribute |
| Fourth ranked attribute | Fifth ranked attribute  |
| Fifth ranked attribute  | Sixth ranked attribute  |
| First ranked attribute  | Third ranked attribute  |

Consistency test

**Step 2: Partial value function elicitation**

Participants were asked to value improvements within each attribute. Participants were told that levels 1 and 2 on the attribute had a score of 0 and 1 respectively and were asked to score level 3 on a scale of 0–10.

**Step 2a:** Score levels of each attribute

| Attribute                   | Level | Score |
|-----------------------------|-------|-------|
| Likelihood of ESRD/dialysis | 30%   | 0     |
|                             | 20%   | 1     |
|                             | 10%   | 3     |

**Step 2b:** Discuss / validate trade-offs (qualitative insights)

**Step 2c:** Normalise scores to sum to 1

## Treatment evaluation

### Step 1: Estimate the value of each treatment

The value of a treatment on each attribute was estimated for each respondent, as illustrated for ESRD risk in the figure below.

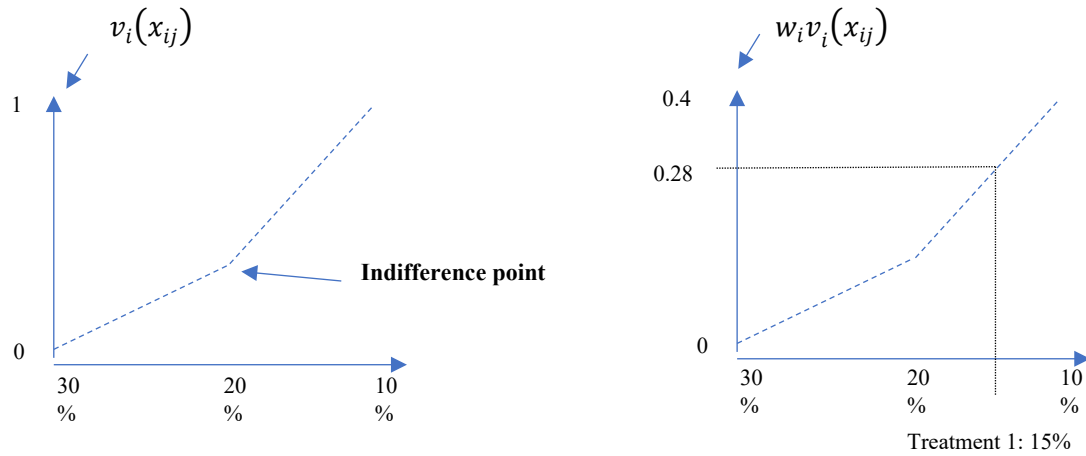

The overall value of the treatment across all attributes was then estimated for each respondent as:

$$U_j = \sum_{i=1}^n w_i v_i(x_{ij})$$

Where

$U_j$  is the overall value generated by treatment  $j$

$w_i$  is the weight associated with attribute  $i$ ,

$v_i$  is the partial value function for attribute  $i$

$x_{ij}$  is the performance of treatment  $j$  on attribute  $i$

**Step 2: Compare the value of treatment**

Each respondent's valuation of each treatment was compared to generate a respondent-specific treatment ranking. The frequency of ranking for each treatment was then estimated across respondents.

| Resp. | Total value |    |    | Rank treatment |    |    |
|-------|-------------|----|----|----------------|----|----|
|       | T1          | T2 | T3 | T1             | T2 | T3 |
| 1     |             |    |    |                |    |    |
| 2     |             |    |    |                |    |    |
| 3     |             |    |    |                |    |    |
| 4     |             |    |    |                |    |    |
| 5     |             |    |    |                |    |    |
| ..... | .....       |    |    |                |    |    |

| Maximum acceptable risk infection, T3 vs |    |
|------------------------------------------|----|
| T1                                       | T2 |
|                                          |    |
|                                          |    |
|                                          |    |
|                                          |    |
|                                          |    |
| .....                                    |    |

**Step 2b:** Estimate the maximum level of e.g. risk of infection that will result in T3 having the same total value as T1 or T2

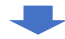

|        |   |   |   |
|--------|---|---|---|
| Rank 1 | % | % | % |
| Rank 2 | % | % | % |
| Rank 3 | % | % | % |

**Step 2a:** Rank total value of treatment for each respondent and the rank probability
