# Supplementary material
Source: PubMed Central journal article supplement (PMC8131174)
Supplement: 40271_2021_521_MOESM2_ESM.pdf [file 40271_2021_521_MOESM2_ESM.pdf]

**Assessing Patient Preferences in Rare Diseases: Direct Preference Elicitation in the  
Rare Chronic Kidney Disease, Immunoglobulin A Nephropathy**

**Assessing Patient Preferences in Rare Diseases: Direct Preference Elicitation in  
Immunoglobulin A Nephropathy**

Authors: Kevin Marsh<sup>1\*</sup>; Kerrie-Anne Ho<sup>2</sup>; Rachel Lo<sup>1</sup>, Nancy Zaour<sup>3</sup>;

Aneesh Thomas George<sup>4</sup>; Nigel S Cook<sup>3</sup>

<sup>1</sup>Evidera, London, UK; <sup>2</sup>UCB Pharma, Slough, UK; <sup>3</sup>Novartis Pharma AG, Basel, Switzerland,

<sup>4</sup>Novartis Healthcare Pvt. Ltd, Hyderabad, India

\*Corresponding Author:

Kevin Marsh

Evidera, London, UK

Ph: +44 (0) 208 576 5025

Email: Kevin.Marsh@evidera.com

**SUPPLEMENTARY MATERIAL – PATIENT CHARACTERISTICS**

|                                              | <b>Overall Sample<br/>(N=40)</b> | <b>US<br/>(N = 25)</b> | <b>China<br/>(N = 15)</b> |
|----------------------------------------------|----------------------------------|------------------------|---------------------------|
| <b>Gender, N(%)</b>                          |                                  |                        |                           |
| Female                                       | 27 (67.5)                        | 17 (68.0)              | 10 (66.7)                 |
| Male                                         | 13 (32.5)                        | 8 (32.0)               | 5 (33.3)                  |
| <b>Age, years</b>                            |                                  |                        |                           |
| Min, Max                                     | 20, 63                           | 20, 63                 | 21,62                     |
| Median (Q1, Q3)                              | 41.0 (35.0, 47.8)                | 44 (39.0, 55.0)        | 35 (29.5, 39.5)           |
| Mean (SD)                                    | 41.6 (11.3)                      | 45.2 (10.7)            | 35.7 (10.1)               |
| <b>Racial Background, N(%)</b>               |                                  |                        |                           |
| White                                        | 17 (68.0)                        | 17 (68.0)              | NA                        |
| Black or African American                    | 3 (12.0)                         | 3 (12.0)               | NA                        |
| Asian                                        | 1 (4.0)                          | 1 (4.0)                | NA                        |
| Hispanic or Latino                           | 4 (16.0)                         | 4 (16.0)               | NA                        |
| Native Hawaiian or other Pacific<br>Islander | 0 (0.0)                          | 0 (0.0)                | NA                        |
| American Indian or Alaska Native             | 0 (0.0)                          | 0 (0.0)                | NA                        |
| Prefer not to say                            | 0 (0.0)                          | 0 (0.0)                | NA                        |
| <b>Employment Status, N(%)</b>               |                                  |                        |                           |
| Employed, full-time                          | 29 (72.5)                        | 16 (64.0)              | 13 (86.7)                 |
| Employed, part-time                          | 3 (7.5)                          | 3 (12.0)               | 0 (0.0)                   |
| Self-employed                                | 2 (5.0)                          | 2 (8.0)                | 0 (0.0)                   |
| Voluntary work                               | 1 (2.5)                          | 1 (4.0)                | 0 (0.0)                   |
| Homemaker                                    | 1 (2.5)                          | 1 (4.0)                | 0 (0.0)                   |
| Student                                      | 2 (5.0)                          | 1 (4.0)                | 1 (6.7)                   |

## Eliciting Patient Preferences for Treatment for Rare Diseases

|                                                              | <b>Overall Sample<br/>(N=40)</b> | <b>US<br/>(N = 25)</b> | <b>China<br/>(N = 15)</b> |
|--------------------------------------------------------------|----------------------------------|------------------------|---------------------------|
| Unemployed                                                   | 0 (0.0)                          | 0 (0.0)                | 0 (0.0)                   |
| Retired                                                      | 3 (7.5)                          | 2 (8.0)                | 1 (6.7)                   |
| On sick leave                                                | 0 (0.0)                          | 0 (0.0)                | 0 (0.0)                   |
| Maternity/paternity leave                                    | 0 (0.0)                          | 0 (0.0)                | 0 (0.0)                   |
| Not able to work due to disability                           | 0 (0.0)                          | 0 (0.0)                | 0 (0.0)                   |
| <b>Education Level, N(%)</b>                                 |                                  |                        |                           |
| Elementary/primary school                                    | 0 (0.0)                          | 0 (0.0)                | 0 (0.0)                   |
| Middle School                                                | 5 (12.5)                         | 2 (8.0)                | 3 (20.0)                  |
| High School                                                  | 9 (22.5)                         | 4 (16.0)               | 5 (33.3)                  |
| College/University (BA, BSc)                                 | 19 (47.5)                        | 12 (48.0)              | 7 (46.7)                  |
| Postgraduate degree (Masters, MD, PhD)                       | 7 (17.5)                         | 7 (28.0)               | 0 (0.0)                   |
| <b>Health Insurance, N(%)</b>                                |                                  |                        |                           |
| Employer-provided insurance (US only)                        | 19 (76.0)                        | 19 (76.0)              | NA                        |
| Self-provided insurance (US only)                            | 6 (24.0)                         | 6 (24.0)               | NA                        |
| Veterans Affairs/Military healthcare (US only)               | 0 (0.0)                          | 0 (0.0)                | NA                        |
| Medicare (US only)                                           | 0 (0.0)                          | 0 (0.0)                | NA                        |
| Medicaid (US only)                                           | 0 (0.0)                          | 0 (0.0)                | NA                        |
| Urban Employee Basic Medical Insurance (UEBMI) (China only)  | 9 (60.0)                         | NA                     | 9 (60.0)                  |
| Urban Residence Basic Medical Insurance (URBMI) (China only) | 6 (40.0)                         | NA                     | 6 (40.0)                  |
| New Rural Cooperative Medical Scheme (NRCMS) (China only)    | 1 (6.7)                          | NA                     | 1 (6.7)                   |

## Eliciting Patient Preferences for Treatment for Rare Diseases

|                                   | <b>Overall Sample<br/>(N=40)</b> | <b>US<br/>(N = 25)</b> | <b>China<br/>(N = 15)</b> |
|-----------------------------------|----------------------------------|------------------------|---------------------------|
| Military Insurance (China only)   | 0 (0.0)                          | NA                     | 0 (0.0)                   |
| None (uninsured)                  | 0 (0.0)                          | 0 (0.0)                | 0 (0.0)                   |
| <b>Time since diagnosis, N(%)</b> |                                  |                        |                           |
| 6-12 months                       | 3 (7.5)                          | 1 (4.0)                | 2 (13.3)                  |
| 1-2 years ago                     | 8 (20.0)                         | 5 (20.0)               | 3 (20.0)                  |
| 2-5 years ago                     | 8 (20.0)                         | 4 (16.0)               | 4 (26.7)                  |
| 5-10 years ago                    | 6 (15.0)                         | 4 (16.0)               | 2 (13.3)                  |
| 10-20 years ago                   | 11 (27.5)                        | 8 (32.0)               | 3 (20.0)                  |
| 20+ years ago                     | 4 (10.0)                         | 3 (12.0)               | 1 (6.7)                   |
| <b>Current treatment, N(%)</b>    |                                  |                        |                           |
| ACEi/ARB                          | 40 (100.0)                       | 25 (100.0)             | 15 (100.0)                |
| Corticosteroid                    | 6 (15.0)                         | 3 (12.0)               | 3 (20.0)                  |
| Immuno-suppressant                | 4 (10.0)                         | 3 (12.0)               | 1 (6.7)                   |
| Other IgAN Treatment              | 10 (25.0)                        | 7 (28.0)               | 3 (20.0)                  |
| <b>Other treatments, N(%)</b>     |                                  |                        |                           |
| Fish oil                          | 18 (45.0)                        | 16 (64.0)              | 2 (13.3)                  |
| Diet control                      | 34 (85.0)                        | 20 (80.0)              | 14 (93.3)                 |
| Tonsillectomy                     | 5 (12.5)                         | 4 (16.0)               | 1 (6.7)                   |
| Others                            | 4 (10.0)                         | 3 (12.0)               | 1 (6.7)                   |
