# Supplementary material
Source: PubMed Central journal article supplement (PMC8131174)
Supplement: 40271_2021_521_MOESM3_ESM.pdf [file 40271_2021_521_MOESM3_ESM.pdf]

**Assessing Patient Preferences in Rare Diseases: Direct Preference Elicitation in the  
Rare Chronic Kidney Disease, Immunoglobulin A Nephropathy**

**Assessing Patient Preferences in Rare Diseases: Direct Preference Elicitation in  
Immunoglobulin A Nephropathy**

Authors: Kevin Marsh<sup>1\*</sup>; Kerrie-Anne Ho<sup>2</sup>; Rachel Lo<sup>1</sup>, Nancy Zaour<sup>3</sup>;

Aneesh Thomas George<sup>4</sup>; Nigel S Cook<sup>3</sup>

<sup>1</sup>Evidera, London, UK; <sup>2</sup>UCB Pharma, Slough, UK; <sup>3</sup>Novartis Pharma AG, Basel, Switzerland,

<sup>4</sup>Novartis Healthcare Pvt. Ltd, Hyderabad, India

\*Corresponding Author:

Kevin Marsh

Evidera, London, UK

Ph: +44 (0) 208 576 5025

Email: Kevin.Marsh@evidera.com

**SUPPLEMENTARY MATERIAL – SUBGROUP ANALYSES**

|                  | <b>Univariable analyses<sup>^†</sup></b> |                                   |                                       |                         |                               |                             |
|------------------|------------------------------------------|-----------------------------------|---------------------------------------|-------------------------|-------------------------------|-----------------------------|
| <b>Variables</b> | <b>Risk of infections</b>                | <b>Risk of other side effects</b> | <b>Ability to do usual activities</b> | <b>Emotional burden</b> | <b>Number of vaccinations</b> | <b>[Ln Phi]<sup>±</sup></b> |
| <b>Country</b>   |                                          |                                   |                                       |                         |                               |                             |
| US               | Reference                                |                                   |                                       |                         |                               |                             |
| China            | 0.323                                    | 0.509*                            | 0.375                                 | -0.139                  | 0.099                         | 0.294                       |
|                  | (0.257)                                  | (0.256)                           | (0.254)                               | (0.302)                 | (0.339)                       | (0.197)                     |
|                  | [-0.181 - 0.828]                         | [0.007 - 1.012]                   | [-0.124 - 0.873]                      | [-0.731 - 0.452]        | [-0.565 - 0.763]              | [-0.091 - 0.679]            |
| <b>Age</b>       |                                          |                                   |                                       |                         |                               |                             |
| <50y             | Reference                                |                                   |                                       |                         |                               |                             |
| 50y and above    | -0.608                                   | -0.629                            | -0.635                                | -0.352                  | -0.049                        | -0.781***                   |
|                  | (0.335)                                  | (0.337)                           | (0.333)                               | (0.366)                 | (0.400)                       | (0.218)                     |
|                  | [-1.265 - 0.049]                         | [-1.290 - 0.033]                  | [-1.288 - 0.018]                      | [-1.070 - 0.366]        | [-0.833 - 0.735]              | [-1.208 - -0.355]           |

Eliciting Patient Preferences for Treatment for Rare Diseases

|                                | Univariable analyses <sup>†</sup> |                            |                                |                  |                        |                       |
|--------------------------------|-----------------------------------|----------------------------|--------------------------------|------------------|------------------------|-----------------------|
| Variables                      | Risk of infections                | Risk of other side effects | Ability to do usual activities | Emotional burden | Number of vaccinations | [Ln Phi] <sup>±</sup> |
| <b>Employment</b>              |                                   |                            |                                |                  |                        |                       |
| In employment                  | Reference                         |                            |                                |                  |                        |                       |
| Not in employment              | 0.239                             | 0.432                      | 0.591*                         | 0.479            | -0.448                 | 0.859**               |
|                                | (0.290)                           | (0.283)                    | (0.272)                        | (0.321)          | (0.441)                | (0.274)               |
|                                | [-0.330 - 0.807]                  | [-0.123 - 0.986]           | [0.057 - 1.126]                | [-0.151 - 1.109] | [-1.313 - 0.417]       | [0.323 - 1.395]       |
| <b>Education</b>               |                                   |                            |                                |                  |                        |                       |
| With college/university degree | Reference                         |                            |                                |                  |                        |                       |
| No college/university degree   | 0.308                             | 0.507*                     | 0.103                          | -0.266           | 0.260                  | 0.442*                |
|                                | (0.253)                           | (0.252)                    | (0.254)                        | (0.302)          | (0.332)                | (0.200)               |
|                                | [-0.188 - 0.805]                  | [0.014 - 1.000]            | [-0.395 - 0.601]               | [-0.857 - 0.326] | [-0.391 - 0.912]       | [0.051 - 0.833]       |

Eliciting Patient Preferences for Treatment for Rare Diseases

|                                        | Univariable analyses <sup>†</sup> |                            |                                |                  |                        |                       |
|----------------------------------------|-----------------------------------|----------------------------|--------------------------------|------------------|------------------------|-----------------------|
| Variables                              | Risk of infections                | Risk of other side effects | Ability to do usual activities | Emotional burden | Number of vaccinations | [Ln Phi] <sup>±</sup> |
| <b>Time since diagnosis</b>            |                                   |                            |                                |                  |                        |                       |
| <10y since diagnosis                   | Reference                         |                            |                                |                  |                        |                       |
| 10y and more since diagnosis           | -0.467                            | -0.299                     | -0.525                         | -0.524           | 0.270                  | -0.702***             |
|                                        | (0.278)                           | (0.276)                    | (0.277)                        | (0.314)          | (0.344)                | (0.195)               |
|                                        | [-1.012 - 0.078]                  | [-0.841 - 0.243]           | [-1.067 - 0.017]               | [-1.140 - 0.092] | [-0.405 - 0.945]       | [-1.084 - -0.319]     |
| <b>Corticosteroid treatment status</b> |                                   |                            |                                |                  |                        |                       |
| Not currently taking corticosteroids   | Reference                         |                            |                                |                  |                        |                       |
| Currently taking corticosteroids       | 0.201                             | 0.076                      | 0.389                          | -0.054           | 0.309                  | 0.519                 |
|                                        | (0.314)                           | (0.322)                    | (0.301)                        | (0.378)          | (0.411)                | (0.267)               |
|                                        | [-0.414 - 0.816]                  | [-0.555 - 0.708]           | [-0.202 - 0.980]               | [-0.795 - 0.686] | [-0.497 - 1.115]       | [-0.005 - 1.043]      |

Eliciting Patient Preferences for Treatment for Rare Diseases

|                                           | <b>Univariable analyses<sup>†</sup></b> |                                   |                                       |                         |                               |                             |
|-------------------------------------------|-----------------------------------------|-----------------------------------|---------------------------------------|-------------------------|-------------------------------|-----------------------------|
| <b>Variables</b>                          | <b>Risk of infections</b>               | <b>Risk of other side effects</b> | <b>Ability to do usual activities</b> | <b>Emotional burden</b> | <b>Number of vaccinations</b> | <b>[Ln Phi]<sup>±</sup></b> |
| <b>Immunosuppressant treatment status</b> |                                         |                                   |                                       |                         |                               |                             |
| Not currently taking immunosuppressants   | Reference                               |                                   |                                       |                         |                               |                             |
| Currently taking immunosuppressants       | -0.165                                  | -0.749                            | 0.098                                 | -0.062                  | -0.392                        | 0.396                       |
|                                           | (0.374)                                 | (0.427)                           | (0.351)                               | (0.425)                 | (0.527)                       | (0.322)                     |
|                                           | [-0.898 - 0.568]                        | [-1.586 - 0.089]                  | [-0.589 - 0.786]                      | [-0.895 - 0.771]        | [-1.424 - 0.641]              | [-0.236 - 1.028]            |
| <b>Level of emotional burden</b>          |                                         |                                   |                                       |                         |                               |                             |
| Not at all/somewhat                       | Reference                               |                                   |                                       |                         |                               |                             |
| Very much emotionally burdened            | -0.033                                  | 0.654                             | 0.147                                 | 0.054                   | 0.658                         | 0.431                       |
|                                           | (0.402)                                 | (0.356)                           | (0.384)                               | (0.454)                 | (0.468)                       | (0.317)                     |
|                                           | [-0.820 - 0.755]                        | [-0.043 - 1.351]                  | [-0.606 - 0.899]                      | [-0.836 - 0.943]        | [-0.258 - 1.575]              | [-0.190 - 1.052]            |

Eliciting Patient Preferences for Treatment for Rare Diseases

|                                     | Univariable analyses <sup>†</sup> |                            |                                |                  |                        |                       |
|-------------------------------------|-----------------------------------|----------------------------|--------------------------------|------------------|------------------------|-----------------------|
| Variables                           | Risk of infections                | Risk of other side effects | Ability to do usual activities | Emotional burden | Number of vaccinations | [Ln Phi] <sup>±</sup> |
| <b>Ability to do usual activity</b> |                                   |                            |                                |                  |                        |                       |
| Not at all/ somewhat                | Reference                         |                            |                                |                  |                        |                       |
| Very much able to do usual activity | -0.359                            | -0.251                     | 0.047                          | -0.062           | 0.187                  | -0.086                |
|                                     | (0.264)                           | (0.268)                    | (0.269)                        | (0.307)          | (0.352)                | (0.199)               |
|                                     | [-0.877 - 0.159]                  | [-0.775 - 0.274]           | [-0.480 - 0.575]               | [-0.664 - 0.540] | [-0.504 - 0.877]       | [-0.476 - 0.305]      |
| <b>KDCS score</b>                   |                                   |                            |                                |                  |                        |                       |
| <60                                 | Reference                         |                            |                                |                  |                        |                       |
| >60                                 | -0.089                            | 0.207                      | 0.153                          | -0.184           | -0.737*                | 0.771***              |
|                                     | (0.248)                           | (0.248)                    | (0.245)                        | (0.283)          | (0.329)                | (0.191)               |
|                                     | [-0.574 - 0.397]                  | [-0.280 - 0.693]           | [-0.327 - 0.633]               | [-0.740 - 0.372] | [-1.382 - -0.091]      | [0.395 - 1.146]       |
| <b>EQ5D score</b>                   |                                   |                            |                                |                  |                        |                       |
|                                     | -0.601                            | 0.289                      | -0.011                         | 0.135            | -0.629                 | 0.083                 |
|                                     | (0.659)                           | (0.798)                    | (0.699)                        | (0.809)          | (0.813)                | (0.676)               |
|                                     | [-1.893 - 0.691]                  | [-1.275 - 1.852]           | [-1.381 - 1.360]               | [-1.450 - 1.720] | [-2.223 - 0.965]       | [-1.242 - 1.407]      |

Standard errors in parentheses

## Eliciting Patient Preferences for Treatment for Rare Diseases

95% Confidence interval in brackets

\*\*\*  $p < 0.001$ , \*\*  $p < 0.01$ , \*  $p < 0.05$

^Loglikelihood of univariable models are: KDCS score= 258.6, EQ5D score =249.8, Ability to do usual activity= 250.8, Level of emotional burden = 251.8, Experience with immunosuppressant=251.2, Experience with corticosteroids=251.6, Time since diagnosis=261.0, Education=254.7, Employment=255.3, Age=262.4, Country=253.1

† The coefficients represent the effect of the observable characteristics on the relative importance of the treatment attributes relative to Likelihood of ESRD; a positive coefficient represents increasing importance while a negative coefficient represents decreasing importance.

± Ln Phi is the precision parameter that represents the shape of the Dirichlet distribution
